# Supplementary material for: Associations of women’s empowerment with neonatal, infant and under-5 mortality in low- and /middle-income countries: meta-analysis of individual participant data from 59 countries
Source: PubMed Central journal article supplement — BMJ Glob Health. 2020 Jan 9;5(1):e001558. doi: 10.1136/bmjgh-2019-001558 (PMC7042599; doi:10.1136/bmjgh-2019-001558), 2020-01-09
Supplement: bmjgh-2019-001558supp001.pdf [file bmjgh-2019-001558supp001.pdf]

## Supplements

**Table S1:** Components of individual level Women's Empowerment Index (ILWEI)

|    | <b>Variables</b>                                                                                                                                                                   | <b>Code</b>                                                                           |
|----|------------------------------------------------------------------------------------------------------------------------------------------------------------------------------------|---------------------------------------------------------------------------------------|
| 1. | Autonomy in health care decision-making                                                                                                                                            | no involvement=0, joint or respondent alone=1                                         |
| 2. | Household decision making<br>(making large household purchases, visits to family or relatives and how to spend money)                                                              | 0 decision, 1 decision, 2 decision and 3 decisions                                    |
| 3. | Justification of domestic violence<br>(if she goes out without telling her husband, neglects the children, argues with her husband or if she refuses to have sex with her husband) | No justification=2, 1-3 reasons=1, 4-5 reasons=0<br>(least autonomy)                  |
| 4. | Frequency of reading newspaper                                                                                                                                                     | Not at all=0, <once a week=1, ≥once a week=2                                          |
| 5. | Respondents worked in last 12 months                                                                                                                                               | No=0, in the past year=1, have a job, but on leave last 7 days=2, currently working=2 |
| 6. | Women's educational level                                                                                                                                                          | No education=0, Primary=1, secondary or more=2                                        |

**Table S2:** Principal component analysis factor loadings for the components used in calculating ILWEI based on the combined dataset

|    | <b>Variables</b>                            | <b>Comp1</b> | <b>Comp2</b> | <b>Comp3</b> |
|----|---------------------------------------------|--------------|--------------|--------------|
| 1. | Autonomy in health care decision-making     | -0.296       | 0.416        | 0.163        |
| 2. | Household decision making                   |              |              |              |
|    | Making large household purchases            | 0.261        | -0.451       | -0.169       |
|    | Visits to family or relatives               | 0.279        | -0.404       | -0.206       |
|    | How to spend money                          | 0.156        | -0.248       | -0.233       |
| 3. | Justification of domestic violence          |              |              |              |
|    | If she goes out without telling her husband | 0.398        | 0.310        | -0.091       |
|    | Neglects the children                       | 0.379        | 0.338        | -0.114       |
|    | Argues with her husband                     | 0.408        | 0.288        | -0.080       |
|    | If she refuses to have sex with her husband | 0.383        | 0.250        | -0.060       |
| 4. | Frequency of reading newspaper              | 0.236        | -0.131       | 0.664        |
| 5. | Respondents worked in last 12 months        | 0.005        | -0.028       | -0.010       |
| 6. | Women's educational level                   | 0.265        | -0.155       | 0.614        |

**Table S3:** Principal component analysis factor loadings for the components used in calculating PLWEI at population level

|    | <b>Variables</b>                                                  | <b>Comp1</b> | <b>Comp2</b> | <b>Comp3</b> |
|----|-------------------------------------------------------------------|--------------|--------------|--------------|
| 1. | Proportion of female population with at least secondary education | 0.434        | 0.789        | -0.435       |
| 2. | Proportion of females' share of parliamentary seats               | 0.707        | 0.001        | 0.707        |
| 3. | Female labour force participation rates                           | -0.558       | 0.614        | 0.558        |

**Table S4:** Country rankings of the average national scores of the ILWEI and PLWEI. Highest scores represent the highest rank in the empowerment index.

| <b>Country</b>     | <b>ILWEI</b> |             | <b>PLWEI</b> |             |
|--------------------|--------------|-------------|--------------|-------------|
|                    | <b>Score</b> | <b>Rank</b> | <b>Score</b> | <b>Rank</b> |
| Ukraine            | 1.645        | 1           | 2.022        | 6           |
| Armenia            | 1.510        | 2           | 2.067        | 5           |
| Moldova            | 1.506        | 3           | 2.384        | 1           |
| Kyrgyz Republic    | 1.385        | 4           | 2.084        | 4           |
| Guyana             | 1.313        | 5           | 1.392        | 8           |
| Dominican Republic | 1.153        | 6           | 0.421        | 23          |
| Jordan             | 1.083        | 7           | 2.359        | 2           |
| Peru               | 1.054        | 8           | 0.741        | 16          |
| Philippines        | 1.018        | 9           | 1.280        | 9           |
| Swaziland          | 0.898        | 10          | 0.253        | 27          |
| Namibia            | 0.861        | 11          | 0.340        | 26          |
| Maldives           | 0.747        | 12          | 0.746        | 15          |
| Albania            | 0.731        | 13          | 2.247        | 3           |
| Azerbaijan         | 0.731        | 14          | 1.475        | 7           |
| Indonesia          | 0.696        | 15          | 0.661        | 19          |
| Colombia           | 0.661        | 16          | 0.726        | 17          |
| Zimbabwe           | 0.639        | 17          | -0.147       | 34          |
| Bolivia            | 0.598        | 18          | 0.639        | 20          |
| Egypt              | 0.547        | 19          | 1.265        | 10          |
| Lesotho            | 0.528        | 20          | -0.337       | 37          |
| Honduras           | 0.506        | 21          | 0.418        | 24          |
| Sao Tome           | 0.500        | 22          | 0.108        | 29          |
| Gabon              | 0.429        | 23          | 0.706        | 18          |
| Nicaragua          | 0.404        | 24          | 0.521        | 21          |
| Bangladesh         | 0.382        | 25          | 0.426        | 22          |
| India              | 0.262        | 26          | 1.168        | 11          |
| Haiti              | 0.245        | 27          | 0.088        | 30          |
| Cambodia           | 0.076        | 28          | -0.443       | 42          |
| Zambia             | 0.075        | 29          | 0.027        | 31          |
| Nepal              | 0.051        | 30          | -0.412       | 40          |
| Malawi             | 0.045        | 31          | -1.490       | 56          |

|                  |        |    |        |    |
|------------------|--------|----|--------|----|
| Kenya            | 0.007  | 32 | -0.311 | 36 |
| Mozambique       | -0.003 | 33 | -1.620 | 58 |
| Congo            | -0.021 | 34 | -0.406 | 39 |
| Timore-Leste     | -0.048 | 35 | 1.061  | 12 |
| Comoros          | -0.094 | 36 | 0.348  | 25 |
| Ghana            | -0.134 | 37 | 0.167  | 28 |
| Pakistan         | -0.137 | 38 | 0.924  | 14 |
| Madagascar       | -0.165 | 39 | -0.910 | 48 |
| Uganda           | -0.165 | 40 | -0.829 | 47 |
| Rwanda           | -0.167 | 41 | -0.072 | 33 |
| Cameroon         | -0.171 | 42 | -0.485 | 43 |
| Tanzania         | -0.262 | 43 | -1.098 | 52 |
| Liberia          | -0.283 | 44 | -0.762 | 45 |
| Nigeria          | -0.321 | 45 | -0.341 | 38 |
| Congo D Republic | -0.404 | 46 | -1.227 | 53 |
| Benin            | -0.478 | 47 | -0.749 | 44 |
| Togo             | -0.482 | 48 | -0.796 | 46 |
| Burundi          | -0.540 | 49 | -0.311 | 35 |
| Morocco          | -0.544 | 50 | 0.931  | 13 |
| Ethiopia         | -0.659 | 51 | -0.439 | 41 |
| Cote D'Ivoire    | -0.703 | 52 | -0.994 | 50 |
| Senegal          | -0.748 | 53 | -0.990 | 49 |
| Niger            | -0.749 | 54 | -1.788 | 59 |
| Sierra Leone     | -0.775 | 55 | -0.062 | 32 |
| Chad             | -0.797 | 56 | -1.459 | 55 |
| Burkina Faso     | -0.891 | 57 | -1.353 | 54 |
| Mali             | -0.900 | 58 | -1.607 | 57 |
| Guinea           | -1.188 | 59 | -1.098 | 51 |
