# Supplementary material for: Associations of women’s empowerment with neonatal, infant and under-5 mortality in low- and /middle-income countries: meta-analysis of individual participant data from 59 countries
Source: PubMed Central journal article supplement — BMJ Glob Health. 2020 Jan 9;5(1):e001558. doi: 10.1136/bmjgh-2019-001558 (PMC7042599; doi:10.1136/bmjgh-2019-001558), 2020-01-09
Supplement: bmjgh-2019-001558supp002.pdf [file bmjgh-2019-001558supp002.pdf]

**Sensitivity analysis****Table S5:** Association of SWPER index with child mortality. Odds ratio (OR) and their 95% confidence intervals (CI) adjusted for potential confounders (maternal age, wealth quintile, BMI, children ever born and father's education).

|                                | n <sup>†</sup> | Weighted percentage | Neonatal mortality |                          |         | Infant mortality |                          |         | Under-5 mortality |                          |         |
|--------------------------------|----------------|---------------------|--------------------|--------------------------|---------|------------------|--------------------------|---------|-------------------|--------------------------|---------|
|                                |                |                     | %                  | OR <sup>‡</sup> (95% CI) | p-value | %                | OR <sup>‡</sup> (95% CI) | p-value | %                 | OR <sup>‡</sup> (95% CI) | p-value |
| <b>Attitude to violence</b>    |                |                     |                    |                          |         |                  |                          |         |                   |                          |         |
| Low                            | 164215         | 33.1                | 4.5                | 1.37 (1.29-1.45)         | <0.001  | 5.3              | 1.34 (1.28-1.40)         | <0.001  | 7.0               | 1.44 (1.39-1.50)         | <0.001  |
| Medium                         | 166385         | 33.6                | 4.0                | 1.23 (1.6-1.30)          | <0.001  | 4.7              | 1.25 (1.20-1.31)         | <0.001  | 6.1               | 1.34 (1.28-1.39)         | <0.001  |
| High                           | 165028         | 33.3                | 3.0                | 1.0                      |         | 3.5              | 1.0                      |         | 4.3               | 1.0                      |         |
| <b>Social independence</b>     |                |                     |                    |                          |         |                  |                          |         |                   |                          |         |
| Low                            | 167527         | 33.8                | 4.5                | 1.14 (1.06-1.22)         | <0.001  | 5.5              | 1.02 (0.97-1.07)         | 0.396   | 7.5               | 1.17 (1.12-1.22)         | <0.001  |
| Medium                         | 165405         | 33.4                | 3.8                | 1.02 (0.97-1.09)         | 0.427   | 4.6              | 1.00 (0.96-1.05)         | 0.945   | 5.8               | 1.07 (1.02-1.12)         | 0.001   |
| High                           | 162697         | 32.8                | 3.2                | 1.0                      |         | 3.4              | 1.0                      |         | 4.0               | 1.0                      |         |
| <b>Decision making</b>         |                |                     |                    |                          |         |                  |                          |         |                   |                          |         |
| Low                            | 168241         | 33.9                | 4.2                | 1.29 (1.23-1.37)         | <0.001  | 5.2              | 1.21 (1.16-1.26)         | <0.001  | 6.8               | 1.29 (1.24-1.33)         | <0.001  |
| Medium                         | 164180         | 33.1                | 3.7                | 1.16 (1.10-1.23)         | <0.001  | 4.4              | 1.09 (1.04-1.14)         | <0.001  | 5.7               | 1.11 (1.07-1.15)         | <0.001  |
| High                           | 163207         | 32.9                | 3.5                | 1.0                      |         | 3.9              | 1.0                      |         | 4.8               | 1.0                      |         |
| <b>SWPER index<sup>§</sup></b> |                |                     |                    |                          |         |                  |                          |         |                   |                          |         |
| Low                            | 168173         | 33.9                | 4.5                | 1.34 (1.26-1.42)         | <0.001  | 5.5              | 1.25 (1.20-1.32)         | <0.001  | 7.5               | 1.41 (1.36-1.47)         | <0.001  |
| Medium                         | 164233         | 33.1                | 3.8                | 1.13 (1.07-1.20)         | <0.001  | 4.7              | 1.13 (1.07-1.18)         | <0.001  | 5.9               | 1.18 (1.14-1.24)         | <0.001  |
| High                           | 163222         | 32.9                | 3.1                | 1.0                      |         | 3.3              | 1.0                      |         | 3.9               | 1.0                      |         |

<sup>†</sup> Weighted number from pooled sample.

<sup>‡</sup> Odds ratio (ORs) for each women's empowerment indicators were separately adjusted for maternal age, wealth quintile, BMI, parity, father's education, country and the year of survey.

<sup>§</sup> SWPER: Survey-based Women's emPowERment index.
