# Supplementary figures and images for: Associations of women’s empowerment with neonatal, infant and under-5 mortality in low- and /middle-income countries: meta-analysis of individual participant data from 59 countries
Source: PubMed Central journal article supplement — BMJ Glob Health. 2020 Jan 9;5(1):e001558. doi: 10.1136/bmjgh-2019-001558 (PMC7042599; doi:10.1136/bmjgh-2019-001558), 2020-01-09

Figure S1: Under-5 mortality for SWPER Index

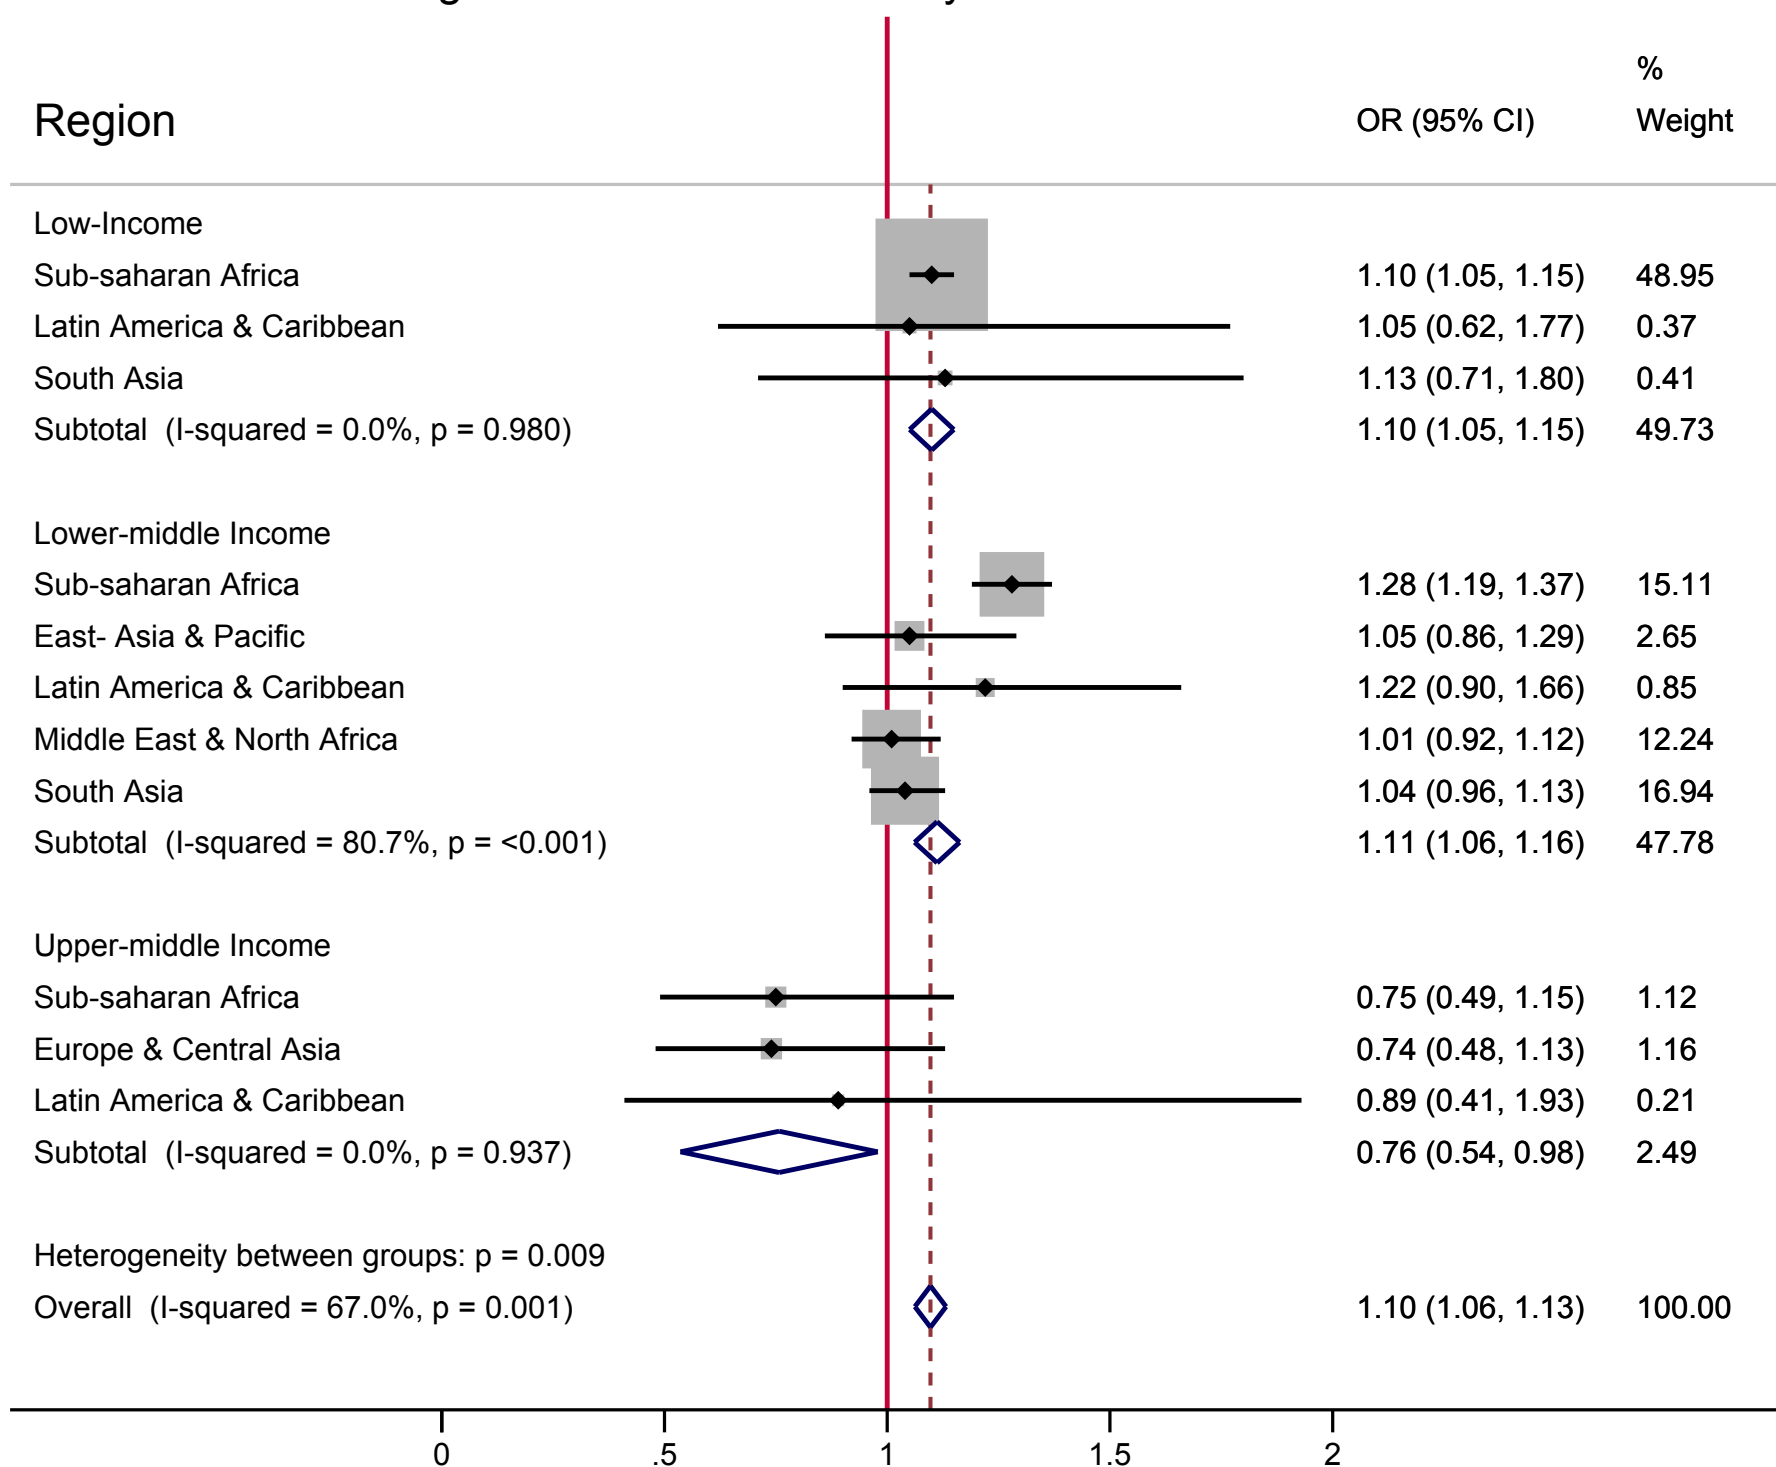

Supplement: bmjgh-2019-001558supp003.pdf [file bmjgh-2019-001558supp003.pdf]

Figure S2: Infant mortality for SWPER Index

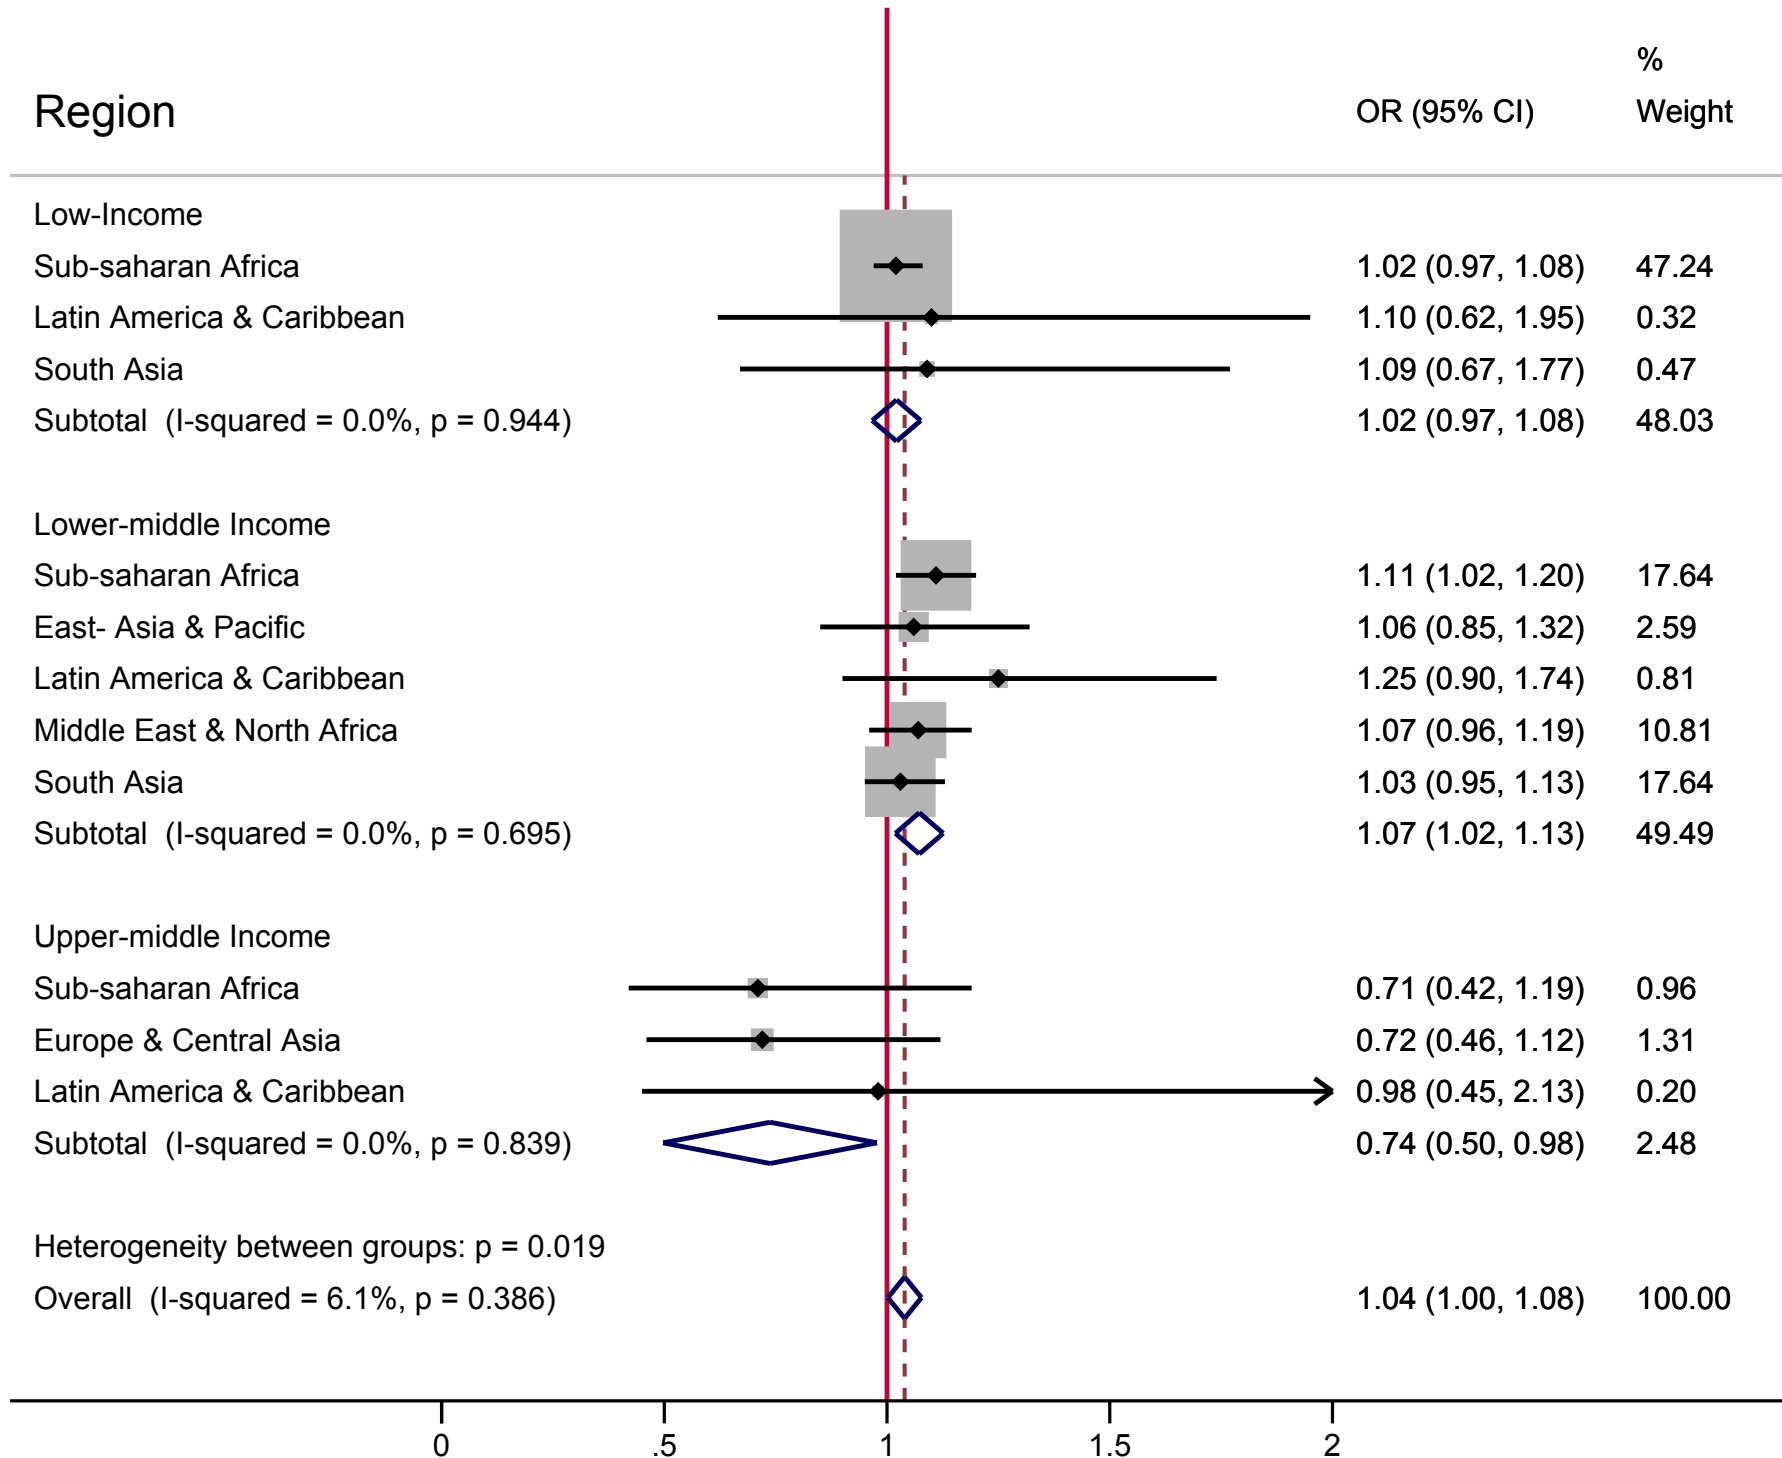

Supplement: bmjgh-2019-001558supp004.pdf [file bmjgh-2019-001558supp004.pdf]

Figure S3: Neonatal mortality for SWPER Index

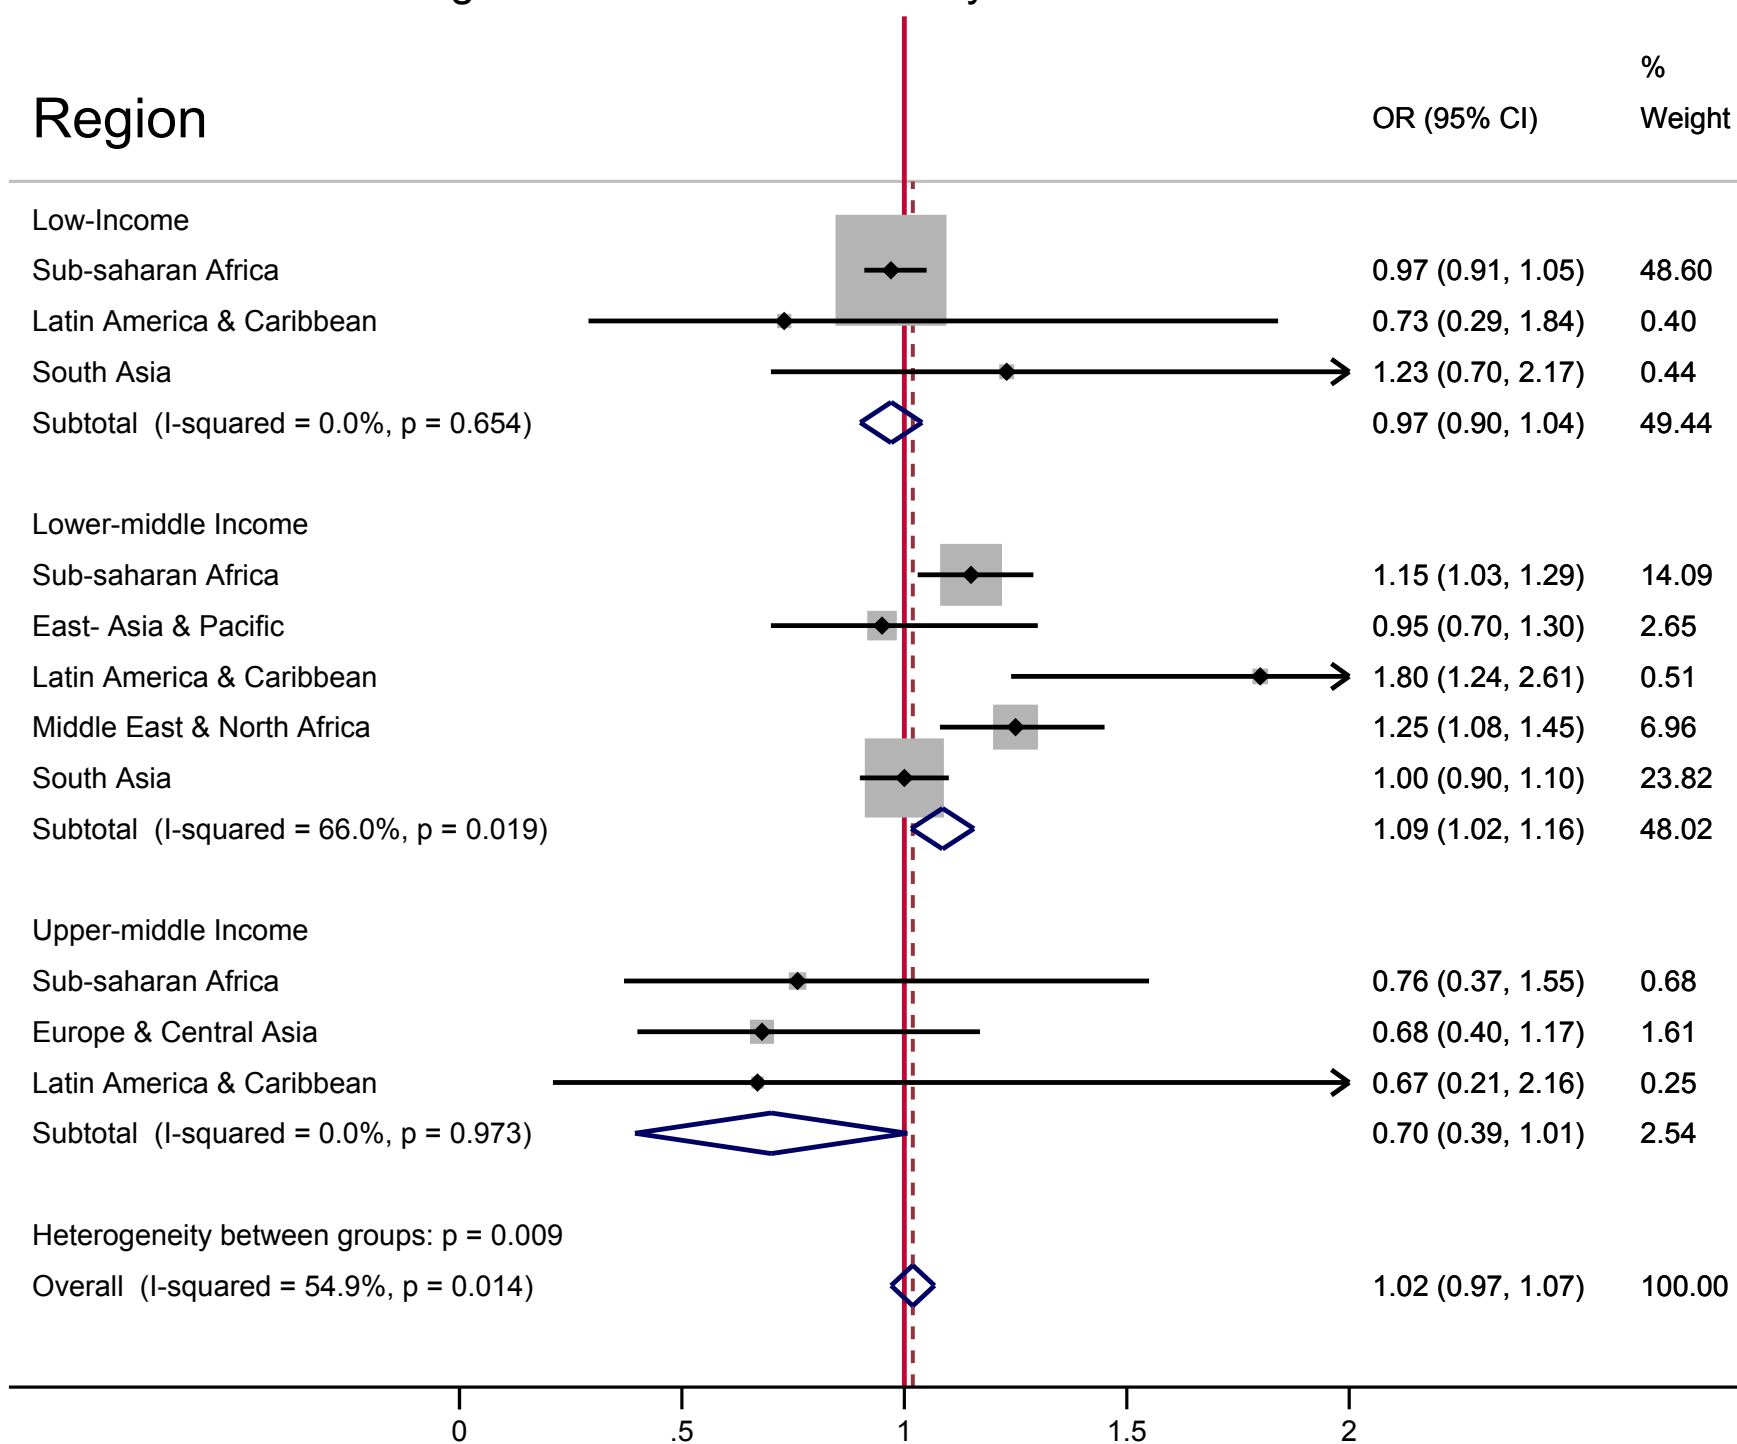

Supplement: bmjgh-2019-001558supp005.pdf [file bmjgh-2019-001558supp005.pdf]
